# Supplementary material
Source: publisher site journal article supplement (https://www.dovepress.com/article/539218)
Supplement: Supplementary file 2 [file 539218 Revised Supplementary Tables.pdf › 539218 Revised Supplementary Tables.pdf]

**SUPPLEMENTARY TABLES**

**Table S1: Summary of data source of different Traits**

**Table S2: SNPs adopted as genetic instruments in mendelian randomization analysis of mood disorders on preeclampsia-eclampsia**

**Table S3: Estimates of causal effect of three subtypes of mood disorders on preeclampsia-eclampsia**

**Table S4: Estimates of causal effect of preeclampsia-eclampsia on three subtypes of mood disorders**

Table S1: Summary of data source of different Traits

| Traits                 | Consortium | Number of SNPs | Number of cases | Number of controls | Sample size | Population | Year | Database ID                                   | Sexes             |
|------------------------|------------|----------------|-----------------|--------------------|-------------|------------|------|-----------------------------------------------|-------------------|
| bipolar disorder       | PGC        | 2427221        | 7481            | 9250               | 16731       | European   | 2011 | ieu-a-801                                     | Males and Females |
| depression             | NA         | 24184163       | 13559           | 435855             | 449414      | European   | 2021 | ebi-a-GCST90018833                            | NA                |
| manic/hyper symptoms   | MRC-IEU    | 9851867        | 3177            | 28140              | 31317       | European   | 2018 | ukb-b-10002                                   | Males and Females |
| preeclampsia-eclampsia | NA         | NA             | 7965            | 211852             | 219817      | European   | NA   | r10.finngen.fi/pheno/O15_PRE_O<br>R_ECLAMPSIA | Females           |
| preeclampsia-eclampsia | NA         | 24165538       | 2355            | 264887             | 267242      | European   | 2021 | ebi-a-GCST90018906                            | Females           |

SNP:single-nucleotide polymorphism; PGC: psychiatry genomics consortium; MRC-IEU: the MRC Integrative Epidemiology Unit.

Table S2: SNPs adopted as genetic instruments in mendelian randomization analysis of mood disorders on preeclampsia-eclampsia

| SNP        | effect<br>allele of<br>exposure | other<br>allele of<br>exposure | effect<br>allele of<br>outcome | other<br>allele of<br>outcome | exposure             | outcome                | beta of<br>exposure | beta of<br>outcome | effect allele<br>frequency<br>of exposure | effect ellele<br>frequency of<br>outcome | position of<br>exposure | standard<br>error of<br>exposure | sample size<br>of exposure | chr | P value of<br>exposure | position of<br>outcome | P-value of<br>outcome | standard<br>error of<br>outcome | sample size<br>of outcome | id.exposure        | id.outcome                     | Steiger<br>direction |
|------------|---------------------------------|--------------------------------|--------------------------------|-------------------------------|----------------------|------------------------|---------------------|--------------------|-------------------------------------------|------------------------------------------|-------------------------|----------------------------------|----------------------------|-----|------------------------|------------------------|-----------------------|---------------------------------|---------------------------|--------------------|--------------------------------|----------------------|
| rs10028075 | T                               | C                              | T                              | C                             | bipolar disorder     | preeclampsia-eclampsia | 0.111602            | -0.00267475        | 0.5088                                    | 0.343162                                 | 86967830                | 0.0235                           | 16731                      | 4   | 1.95E-06               | 86046677               | 0.875987              | 0.0171395                       | 219817                    | ieu-a-801          | lfinngen_R10_015_PRE_OR_ECLAMP | TRUE                 |
| rs10994397 | T                               | C                              | T                              | C                             | bipolar disorder     | preeclampsia-eclampsia | 0.297867            | 0.0456619          |                                           | 0.170228                                 | 62279124                | 0.048                            | 16731                      | 10  | 5.54E-10               | 60519366               | 0.0346689             | 0.0216181                       | 219817                    | ieu-a-801          | lfinngen_R10_015_PRE_OR_ECLAMP | TRUE                 |
| rs11085829 | A                               | G                              | A                              | G                             | bipolar disorder     | preeclampsia-eclampsia | -0.141679           | -0.0314006         | 0.35                                      | 0.256834                                 | 13174312                | 0.0287                           | 16731                      | 19  | 7.85E-07               | 13063498               | 0.0913545             | 0.018599                        | 219817                    | ieu-a-801          | lfinngen_R10_015_PRE_OR_ECLAMP | TRUE                 |
| rs12576775 | G                               | A                              | G                              | A                             | bipolar disorder     | preeclampsia-eclampsia | 0.167236            | 0.06175            |                                           | 0.181978                                 | 79077193                | 0.0301                           | 16731                      | 11  | 2.66E-08               | 79366149               | 0.00292523            | 0.0207529                       | 219817                    | ieu-a-801          | lfinngen_R10_015_PRE_OR_ECLAMP | TRUE                 |
| rs12912251 | T                               | G                              | T                              | G                             | bipolar disorder     | preeclampsia-eclampsia | -0.122218           | -0.0174367         | 0.2083                                    | 0.259078                                 | 38986368                | 0.0258                           | 16731                      | 15  | 2.10E-06               | 38694167               | 0.347487              | 0.01856                         | 219817                    | ieu-a-801          | lfinngen_R10_015_PRE_OR_ECLAMP | TRUE                 |
| rs2281587  | T                               | C                              | T                              | C                             | bipolar disorder     | preeclampsia-eclampsia | -0.113061           | -0.047103          | 0.3583                                    | 0.241445                                 | 105377349               | 0.0247                           | 16731                      | 10  | 4.78E-06               | 103617592              | 0.0136452             | 0.0190973                       | 219817                    | ieu-a-801          | lfinngen_R10_015_PRE_OR_ECLAMP | TRUE                 |
| rs2287921  | C                               | T                              | C                              | T                             | bipolar disorder     | preeclampsia-eclampsia | 0.115469            | -0.012716          | 0.5678                                    | 0.433188                                 | 49228272                | 0.025                            | 16731                      | 19  | 4.00E-06               | 48725015               | 0.438945              | 0.0164295                       | 219817                    | ieu-a-801          | lfinngen_R10_015_PRE_OR_ECLAMP | TRUE                 |
| rs3845817  | C                               | T                              | C                              | T                             | bipolar disorder     | preeclampsia-eclampsia | -0.110708           | -0.0253036         | 0.5917                                    | 0.610562                                 | 65758525                | 0.024                            | 16731                      | 2   | 3.92E-06               | 65531391               | 0.129379              | 0.0166849                       | 219817                    | ieu-a-801          | lfinngen_R10_015_PRE_OR_ECLAMP | TRUE                 |
| rs4332037  | T                               | C                              | T                              | C                             | bipolar disorder     | preeclampsia-eclampsia | 0.142486            | 0.0099974          | 0.1417                                    | 0.246834                                 | 1950809                 | 0.031                            | 16731                      | 7   | 4.28E-06               | 1911173                | 0.5948                | 0.0187959                       | 219817                    | ieu-a-801          | lfinngen_R10_015_PRE_OR_ECLAMP | TRUE                 |
| rs6550435  | G                               | T                              | G                              | T                             | bipolar disorder     | preeclampsia-eclampsia | 0.111631            | 0.00575202         | 0.3509                                    | 0.317781                                 | 36864489                | 0.0244                           | 16731                      | 3   | 4.80E-06               | 36822998               | 0.742325              | 0.0174952                       | 219817                    | ieu-a-801          | lfinngen_R10_015_PRE_OR_ECLAMP | TRUE                 |
| rs6746896  | G                               | A                              | G                              | A                             | bipolar disorder     | preeclampsia-eclampsia | -0.127249           | -0.00768362        | 0.2917                                    | 0.453673                                 | 97410949                | 0.0251                           | 16731                      | 2   | 4.20E-07               | 96745212               | 0.637782              | 0.0163202                       | 219817                    | ieu-a-801          | lfinngen_R10_015_PRE_OR_ECLAMP | TRUE                 |
| rs7296288  | C                               | A                              | C                              | A                             | bipolar disorder     | preeclampsia-eclampsia | 0.137195            | 0.0175164          | 0.4831                                    | 0.537338                                 | 49479968                | 0.0239                           | 16731                      | 12  | 9.39E-09               | 49086185               | 0.281827              | 0.0162758                       | 219817                    | ieu-a-801          | lfinngen_R10_015_PRE_OR_ECLAMP | TRUE                 |
| rs736408   | T                               | C                              | T                              | C                             | bipolar disorder     | preeclampsia-eclampsia | -0.134094           | -0.0326533         | 0.3083                                    | 0.381689                                 | 52835354                | 0.0258                           | 16731                      | 3   | 1.99E-07               | 52801338               | 0.051259              | 0.0167512                       | 219817                    | ieu-a-801          | lfinngen_R10_015_PRE_OR_ECLAMP | TRUE                 |
| rs9371601  | T                               | G                              | T                              | G                             | bipolar disorder     | preeclampsia-eclampsia | 0.142716            | 0.0155009          | 0.3333                                    | 0.336779                                 | 152790573               | 0.0243                           | 16731                      | 6   | 4.33E-09               | 152469438              | 0.368084              | 0.0172219                       | 219817                    | ieu-a-801          | lfinngen_R10_015_PRE_OR_ECLAMP | TRUE                 |
| rs10493901 | G                               | T                              | G                              | T                             | depression           | preeclampsia-eclampsia | -0.2924             | 0.0869847          | 0.0336522                                 | 0.0123509                                | 98833455                | 0.0617                           | 449414                     | 1   | 2.18E-06               | 98367899               | 0.241137              | 0.0742095                       | 219817                    | ebi-a-GCST90018833 | lfinngen_R10_015_PRE_OR_ECLAMP | TRUE                 |
| rs10957334 | A                               | G                              | A                              | G                             | depression           | preeclampsia-eclampsia | 0.0715              | 0.010772           | 0.338452                                  | 0.313713                                 | 65960510                | 0.0144                           | 449414                     | 8   | 7.30E-07               | 65048275               | 0.537123              | 0.0174539                       | 219817                    | ebi-a-GCST90018833 | lfinngen_R10_015_PRE_OR_ECLAMP | TRUE                 |
| rs11136497 | T                               | C                              | T                              | C                             | depression           | preeclampsia-eclampsia | 1.279               | 0.0588142          | 0.0235063                                 | 0.0315587                                | 111629006               | 0.2751                           | 449414                     | 1   | 3.33E-06               | 111086384              | 0.209093              | 0.0468242                       | 219817                    | ebi-a-GCST90018833 | lfinngen_R10_015_PRE_OR_ECLAMP | TRUE                 |
| rs11612711 | A                               | G                              | A                              | G                             | depression           | preeclampsia-eclampsia | 0.3078              | 0.124295           | 0.0164089                                 | 0.011505                                 | 11816618                | 0.0653                           | 449414                     | 5   | 2.44E-06               | 11816506               | 0.112625              | 0.0783455                       | 219817                    | ebi-a-GCST90018833 | lfinngen_R10_015_PRE_OR_ECLAMP | TRUE                 |
| rs13417898 | C                               | T                              | C                              | T                             | depression           | preeclampsia-eclampsia | -0.0671             | -0.0243354         | 0.32157                                   | 0.404975                                 | 38516428                | 0.0139                           | 449414                     | 2   | 1.39E-06               | 38289286               | 0.141636              | 0.0165577                       | 219817                    | ebi-a-GCST90018833 | lfinngen_R10_015_PRE_OR_ECLAMP | TRUE                 |
| rs14517651 | A                               | G                              | A                              | G                             | depression           | preeclampsia-eclampsia | 0.0843              | -0.00282682        | 0.171359                                  | 0.182142                                 | 631574                  | 0.0183                           | 449414                     | 19  | 3.90E-06               | 631574                 | 0.893863              | 0.0211878                       | 219817                    | ebi-a-GCST90018833 | lfinngen_R10_015_PRE_OR_ECLAMP | TRUE                 |
| rs17795658 | C                               | T                              | C                              | T                             | depression           | preeclampsia-eclampsia | 0.0887              | -0.014614          | 0.117269                                  | 0.152213                                 | 26830227                | 0.0191                           | 449414                     | 16  | 3.52E-06               | 26818906               | 0.518936              | 0.0226578                       | 219817                    | ebi-a-GCST90018833 | lfinngen_R10_015_PRE_OR_ECLAMP | TRUE                 |
| rs1842806  | T                               | C                              | T                              | C                             | depression           | preeclampsia-eclampsia | -0.0639             | -0.0143976         | 0.669173                                  | 0.605074                                 | 43486923                | 0.0139                           | 449414                     | 3   | 4.63E-06               | 43445431               | 0.386462              | 0.0166244                       | 219817                    | ebi-a-GCST90018833 | lfinngen_R10_015_PRE_OR_ECLAMP | TRUE                 |
| rs1856246  | G                               | T                              | G                              | T                             | depression           | preeclampsia-eclampsia | 0.0619              | -0.0110794         | 0.413292                                  | 0.507786                                 | 125057899               | 0.0135                           | 449414                     | 6   | 4.73E-06               | 124736753              | 0.496372              | 0.0162883                       | 219817                    | ebi-a-GCST90018833 | lfinngen_R10_015_PRE_OR_ECLAMP | TRUE                 |
| rs18950424 | C                               | A                              | C                              | A                             | depression           | preeclampsia-eclampsia | 0.22                | 0.0321188          | 0.027041                                  | 0.0230431                                | 155887039               | 0.0478                           | 449414                     | 6   | 4.09E-06               | 155565905              | 0.562501              | 0.0554603                       | 219817                    | ebi-a-GCST90018833 | lfinngen_R10_015_PRE_OR_ECLAMP | TRUE                 |
| rs2046918  | A                               | G                              | A                              | G                             | depression           | preeclampsia-eclampsia | 0.0717              | 0.0086425          | 0.297229                                  | 0.253987                                 | 191887975               | 0.0155                           | 449414                     | 3   | 3.88E-06               | 192170186              | 0.647769              | 0.018917                        | 219817                    | ebi-a-GCST90018833 | lfinngen_R10_015_PRE_OR_ECLAMP | TRUE                 |
| rs34608209 | T                               | G                              | T                              | G                             | depression           | preeclampsia-eclampsia | 0.5941              | 0.200347           | 0.00532435                                | 0.00337296                               | 38569012                | 0.1282                           | 449414                     | 1   | 3.61E-06               | 38103340               | 0.160361              | 0.142712                        | 219817                    | ebi-a-GCST90018833 | lfinngen_R10_015_PRE_OR_ECLAMP | TRUE                 |
| rs35130355 | T                               | C                              | T                              | C                             | depression           | preeclampsia-eclampsia | -0.0635             | 0.0227359          | 0.481135                                  | 0.436501                                 | 208329196               | 0.0137                           | 449414                     | 2   | 3.49E-06               | 207464472              | 0.167171              | 0.0164591                       | 219817                    | ebi-a-GCST90018833 | lfinngen_R10_015_PRE_OR_ECLAMP | TRUE                 |
| rs4962579  | T                               | C                              | T                              | C                             | depression           | preeclampsia-eclampsia | 0.0723              | 0.00623464         | 0.517175                                  | 0.617943                                 | 126156923               | 0.014                            | 449414                     | 10  | 2.47E-07               | 124468354              | 0.712108              | 0.0168948                       | 219817                    | ebi-a-GCST90018833 | lfinngen_R10_015_PRE_OR_ECLAMP | TRUE                 |
| rs6668851  | A                               | C                              | A                              | C                             | depression           | preeclampsia-eclampsia | -0.0682             | -0.00290641        | 0.663019                                  | 0.647453                                 | 226545866               | 0.014                            | 449414                     | 1   | 1.03E-06               | 226358165              | 0.863893              | 0.0169548                       | 219817                    | ebi-a-GCST90018833 | lfinngen_R10_015_PRE_OR_ECLAMP | TRUE                 |
| rs73487503 | T                               | C                              | T                              | C                             | depression           | preeclampsia-eclampsia | 0.1164              | 0.00864865         | 0.0907471                                 | 0.100684                                 | 40856982                | 0.0233                           | 449414                     | 18  | 5.72E-07               | 43277017               | 0.748497              | 0.0269746                       | 219817                    | ebi-a-GCST90018833 | lfinngen_R10_015_PRE_OR_ECLAMP | TRUE                 |
| rs74702231 | T                               | A                              | T                              | A                             | depression           | preeclampsia-eclampsia | 0.0787              | 0.0203608          | 0.145008                                  | 0.215956                                 | 4817433                 | 0.0169                           | 449414                     | 16  | 3.07E-06               | 4767432                | 0.3049                | 0.0198452                       | 219817                    | ebi-a-GCST90018833 | lfinngen_R10_015_PRE_OR_ECLAMP | TRUE                 |
| rs7835373  | A                               | G                              | A                              | G                             | depression           | preeclampsia-eclampsia | 0.0846              | 0.0143846          | 0.227066                                  | 0.149184                                 | 78362277                | 0.0184                           | 449414                     | 8   | 4.21E-06               | 77450041               | 0.530077              | 0.0229095                       | 219817                    | ebi-a-GCST90018833 | lfinngen_R10_015_PRE_OR_ECLAMP | TRUE                 |
| rs7920460  | T                               | C                              | T                              | C                             | depression           | preeclampsia-eclampsia | 0.0978              | 0.0164082          | 0.178569                                  | 0.114704                                 | 80838651                | 0.0202                           | 449414                     | 10  | 1.29E-06               | 79078894               | 0.519454              | 0.0254711                       | 219817                    | ebi-a-GCST90018833 | lfinngen_R10_015_PRE_OR_ECLAMP | TRUE                 |
| rs8061978  | T                               | C                              | T                              | C                             | depression           | preeclampsia-eclampsia | 0.0692              | -0.0186531         | 0.247228                                  | 0.318858                                 | 73140324                | 0.0151                           | 449414                     | 16  | 4.34E-06               | 73106425               | 0.286064              | 0.0174852                       | 219817                    | ebi-a-GCST90018833 | lfinngen_R10_015_PRE_OR_ECLAMP | TRUE                 |
| rs916241   | C                               | T                              | C                              | T                             | depression           | preeclampsia-eclampsia | -0.0755             | -0.00114424        | 0.833011                                  | 0.756124                                 | 49700618                | 0.0162                           | 449414                     | 22  | 3.15E-06               | 49304693               | 0.951879              | 0.0189607                       | 219817                    | ebi-a-GCST90018833 | lfinngen_R10_015_PRE_OR_ECLAMP | TRUE                 |
| rs9498371  | C                               | T                              | C                              | T                             | depression           | preeclampsia-eclampsia | 0.0666              | 0.0407833          | 0.47302                                   | 0.402928                                 | 149884597               | 0.0138                           | 449414                     | 6   | 1.43E-06               | 149563461              | 0.0140809             | 0.016611                        | 219817                    | ebi-a-GCST90018833 | lfinngen_R10_015_PRE_OR_ECLAMP | TRUE                 |
| rs10036272 | T                               | C                              | T                              | C                             | manic/hyper symptoms | preeclampsia-eclampsia | 0.014218            | -0.0225744         | 0.775676                                  | 0.766974                                 | 180130876               | 0.00294265                       | 31317                      | 5   | 1.40E-06               | 180703876              | 0.241914              | 0.0192908                       | 219817                    | ukb-b-10002        | lfinngen_R10_015_PRE_OR_ECLAMP | TRUE                 |
| rs10148448 | A                               | G                              | A                              | G                             | manic/hyper symptoms | preeclampsia-eclampsia | 0.0134566           | -0.0148262         | 0.249549                                  | 0.240573                                 | 101026148               | 0.00280614                       | 31317                      | 14  | 1.60E-06               | 100559811              | 0.436251              | 0.0190436                       | 219817                    | ukb-b-10002        | lfinngen_R10_015_PRE_OR_ECLAMP | TRUE                 |
| rs11712949 | A                               | T                              | A                              | T                             | manic/hyper symptoms | preeclampsia-eclampsia | 0.0109814           | -0.00480013        | 0.288435                                  | 0.277842                                 | 63504643                | 0.00268497                       | 31317                      | 3   | 4.30E-05               | 63518967               | 0.791748              | 0.0181795                       | 219817                    | ukb-b-10002        | lfinngen_R10_015_PRE_OR_ECLAMP | TRUE                 |

|            |   |   |   |   |                      |                        |            |             |           |           |           |            |        |    |          |           |           |           |        |                    |                                |      |
|------------|---|---|---|---|----------------------|------------------------|------------|-------------|-----------|-----------|-----------|------------|--------|----|----------|-----------|-----------|-----------|--------|--------------------|--------------------------------|------|
| rs12110199 | T | C | T | C | manic/hyper symptoms | preeclampsia-eclampsia | -0.0132326 | -0.0101393  | 0.219023  | 0.193266  | 171975508 | 0.00295781 | 31317  | 5  | 7.70E-06 | 172548505 | 0.622977  | 0.0206236 | 219817 | ukb-b-10002        | lfinngen_R10_015_PRE_OR_ECLAMP | TRUE |
| rs12222810 | T | C | T | C | manic/hyper symptoms | preeclampsia-eclampsia | 0.0150598  | 0.0125416   | 0.126     | 0.144262  | 124816420 | 0.00366631 | 31317  | 11 | 4.00E-05 | 124946524 | 0.588993  | 0.0232125 | 219817 | ukb-b-10002        | lfinngen_R10_015_PRE_OR_ECLAMP | TRUE |
| rs13084980 | T | C | T | C | manic/hyper symptoms | preeclampsia-eclampsia | 0.0113628  | -0.00315291 | 0.269466  | 0.304876  | 189127455 | 0.00273599 | 31317  | 3  | 3.30E-05 | 189409666 | 0.858389  | 0.0176708 | 219817 | ukb-b-10002        | lfinngen_R10_015_PRE_OR_ECLAMP | TRUE |
| rs13110183 | A | G | A | G | manic/hyper symptoms | preeclampsia-eclampsia | -0.0103515 | 0.00259192  | 0.387015  | 0.495074  | 156952899 | 0.00247977 | 31317  | 4  | 3.00E-05 | 156031747 | 0.873533  | 0.0162837 | 219817 | ukb-b-10002        | lfinngen_R10_015_PRE_OR_ECLAMP | TRUE |
| rs1443871  | T | C | T | C | manic/hyper symptoms | preeclampsia-eclampsia | -0.0103086 | 0.0135857   | 0.522457  | 0.498828  | 80091453  | 0.00240994 | 31317  | 9  | 1.90E-05 | 77476537  | 0.403429  | 0.0162604 | 219817 | ukb-b-10002        | lfinngen_R10_015_PRE_OR_ECLAMP | TRUE |
| rs1529306  | T | C | T | C | manic/hyper symptoms | preeclampsia-eclampsia | -0.0106828 | 0.0128491   | 0.338559  | 0.296623  | 168404458 | 0.00255721 | 31317  | 2  | 2.90E-05 | 167547948 | 0.472128  | 0.0178703 | 219817 | ukb-b-10002        | lfinngen_R10_015_PRE_OR_ECLAMP | TRUE |
| rs177770   | C | A | C | A | manic/hyper symptoms | preeclampsia-eclampsia | -0.0103705 | -0.0153197  | 0.638716  | 0.615065  | 3663825   | 0.00251484 | 31317  | 4  | 3.70E-05 | 3662098   | 0.361575  | 0.0167911 | 219817 | ukb-b-10002        | lfinngen_R10_015_PRE_OR_ECLAMP | TRUE |
| rs1806201  | A | G | A | G | manic/hyper symptoms | preeclampsia-eclampsia | 0.0127571  | 0.0364684   | 0.270501  | 0.358981  | 13717508  | 0.00271198 | 31317  | 12 | 2.60E-06 | 13564574  | 0.0311071 | 0.0169172 | 219817 | ukb-b-10002        | lfinngen_R10_015_PRE_OR_ECLAMP | TRUE |
| rs2059725  | A | G | A | G | manic/hyper symptoms | preeclampsia-eclampsia | -0.0110375 | 0.008579    | 0.677594  | 0.647592  | 109359052 | 0.00259783 | 31317  | 2  | 2.10E-05 | 108742596 | 0.61567   | 0.0170898 | 219817 | ukb-b-10002        | lfinngen_R10_015_PRE_OR_ECLAMP | TRUE |
| rs2279945  | A | C | A | C | manic/hyper symptoms | preeclampsia-eclampsia | 0.0133564  | -0.00907794 | 0.176808  | 0.234423  | 200952422 | 0.00314944 | 31317  | 1  | 2.20E-05 | 200983294 | 0.635483  | 0.0191508 | 219817 | ukb-b-10002        | lfinngen_R10_015_PRE_OR_ECLAMP | TRUE |
| rs2817666  | A | G | A | G | manic/hyper symptoms | preeclampsia-eclampsia | -0.010278  | -0.004135   | 0.418064  | 0.36211   | 98933853  | 0.00245263 | 31317  | 10 | 2.80E-05 | 97174096  | 0.80826   | 0.0170395 | 219817 | ukb-b-10002        | lfinngen_R10_015_PRE_OR_ECLAMP | TRUE |
| rs28396295 | T | G | T | G | manic/hyper symptoms | preeclampsia-eclampsia | 0.0101724  | 0.0157073   | 0.444503  | 0.440244  | 131395712 | 0.00242666 | 31317  | 8  | 2.80E-05 | 130383466 | 0.338109  | 0.0163975 | 219817 | ukb-b-10002        | lfinngen_R10_015_PRE_OR_ECLAMP | TRUE |
| rs302164   | A | G | A | G | manic/hyper symptoms | preeclampsia-eclampsia | -0.01353   | -0.0220216  | 0.811559  | 0.787313  | 18325674  | 0.00307688 | 31317  | 7  | 1.10E-05 | 18286051  | 0.26623   | 0.0198074 | 219817 | ukb-b-10002        | lfinngen_R10_015_PRE_OR_ECLAMP | TRUE |
| rs34025630 | T | C | T | C | manic/hyper symptoms | preeclampsia-eclampsia | 0.0140517  | -0.0127286  | 0.167848  | 0.193521  | 11768444  | 0.00323807 | 31317  | 11 | 1.40E-05 | 11746897  | 0.536362  | 0.0205856 | 219817 | ukb-b-10002        | lfinngen_R10_015_PRE_OR_ECLAMP | TRUE |
| rs34087764 | A | G | A | G | manic/hyper symptoms | preeclampsia-eclampsia | 0.0114222  | -0.0235739  | 0.27      | 0.232532  | 79409739  | 0.00273915 | 31317  | 9  | 3.00E-05 | 76794823  | 0.225195  | 0.0194371 | 219817 | ukb-b-10002        | lfinngen_R10_015_PRE_OR_ECLAMP | TRUE |
| rs358227   | G | A | G | A | manic/hyper symptoms | preeclampsia-eclampsia | -0.0143387 | 0.000117537 | 0.851961  | 0.85041   | 22823651  | 0.00339059 | 31317  | 4  | 2.30E-05 | 22822028  | 0.995885  | 0.0227888 | 219817 | ukb-b-10002        | lfinngen_R10_015_PRE_OR_ECLAMP | TRUE |
| rs418979   | G | A | G | A | manic/hyper symptoms | preeclampsia-eclampsia | 0.0104147  | 0.0112903   | 0.48718   | 0.545146  | 86228343  | 0.00240551 | 31317  | 1  | 1.50E-05 | 85762660  | 0.489403  | 0.016333  | 219817 | ukb-b-10002        | lfinngen_R10_015_PRE_OR_ECLAMP | TRUE |
| rs4446570  | T | C | T | C | manic/hyper symptoms | preeclampsia-eclampsia | -0.0151565 | 0.0315933   | 0.85971   | 0.852611  | 43782977  | 0.00353415 | 31317  | 6  | 1.80E-05 | 43815240  | 0.170322  | 0.0230411 | 219817 | ukb-b-10002        | lfinngen_R10_015_PRE_OR_ECLAMP | TRUE |
| rs450266   | A | C | A | C | manic/hyper symptoms | preeclampsia-eclampsia | 0.0108891  | 0.00915356  | 0.640762  | 0.649412  | 62575738  | 0.00251698 | 31317  | 5  | 1.50E-05 | 63279911  | 0.591164  | 0.017041  | 219817 | ukb-b-10002        | lfinngen_R10_015_PRE_OR_ECLAMP | TRUE |
| rs4866447  | A | G | A | G | manic/hyper symptoms | preeclampsia-eclampsia | -0.013221  | -0.0184894  | 0.234311  | 0.196265  | 3454482   | 0.00288045 | 31317  | 5  | 4.40E-06 | 3454368   | 0.369424  | 0.0205998 | 219817 | ukb-b-10002        | lfinngen_R10_015_PRE_OR_ECLAMP | TRUE |
| rs4949324  | A | G | A | G | manic/hyper symptoms | preeclampsia-eclampsia | -0.0116202 | 0.030819    | 0.674761  | 0.758175  | 31377743  | 0.0025671  | 31317  | 1  | 6.00E-06 | 30904896  | 0.108453  | 0.0191997 | 219817 | ukb-b-10002        | lfinngen_R10_015_PRE_OR_ECLAMP | TRUE |
| rs6439441  | G | A | G | A | manic/hyper symptoms | preeclampsia-eclampsia | -0.0101716 | -0.00317183 | 0.537874  | 0.481138  | 133529594 | 0.00243175 | 31317  | 3  | 2.90E-05 | 133810750 | 0.845768  | 0.0163059 | 219817 | ukb-b-10002        | lfinngen_R10_015_PRE_OR_ECLAMP | TRUE |
| rs67629630 | A | G | A | G | manic/hyper symptoms | preeclampsia-eclampsia | -0.0121482 | -0.0191317  | 0.29258   | 0.34501   | 75632086  | 0.0026764  | 31317  | 17 | 5.70E-06 | 77636004  | 0.265278  | 0.0171738 | 219817 | ukb-b-10002        | lfinngen_R10_015_PRE_OR_ECLAMP | TRUE |
| rs72915525 | T | G | T | G | manic/hyper symptoms | preeclampsia-eclampsia | 0.0144257  | 0.00370391  | 0.144713  | 0.109409  | 45880255  | 0.0034441  | 31317  | 18 | 2.80E-05 | 48353884  | 0.886369  | 0.0259195 | 219817 | ukb-b-10002        | lfinngen_R10_015_PRE_OR_ECLAMP | TRUE |
| rs7326804  | T | G | T | G | manic/hyper symptoms | preeclampsia-eclampsia | -0.0116908 | -0.00379278 | 0.73083   | 0.73569   | 30310382  | 0.0027359  | 31317  | 13 | 1.90E-05 | 29736245  | 0.837354  | 0.0184762 | 219817 | ukb-b-10002        | lfinngen_R10_015_PRE_OR_ECLAMP | TRUE |
| rs736253   | T | C | T | C | manic/hyper symptoms | preeclampsia-eclampsia | -0.011063  | -0.00306786 | 0.368817  | 0.427042  | 93072009  | 0.0025031  | 31317  | 9  | 9.90E-06 | 90309727  | 0.85215   | 0.0164606 | 219817 | ukb-b-10002        | lfinngen_R10_015_PRE_OR_ECLAMP | TRUE |
| rs74078208 | C | T | C | T | manic/hyper symptoms | preeclampsia-eclampsia | 0.0109013  | -0.00263805 | 0.339167  | 0.311405  | 98499682  | 0.0025568  | 31317  | 14 | 2.00E-05 | 98033345  | 0.880787  | 0.0175904 | 219817 | ukb-b-10002        | lfinngen_R10_015_PRE_OR_ECLAMP | TRUE |
| rs7905367  | C | G | C | G | manic/hyper symptoms | preeclampsia-eclampsia | 0.0136682  | -0.00390321 | 0.796245  | 0.723946  | 54334653  | 0.00300029 | 31317  | 10 | 5.20E-06 | 52574893  | 0.833015  | 0.018513  | 219817 | ukb-b-10002        | lfinngen_R10_015_PRE_OR_ECLAMP | TRUE |
| rs923744   | G | A | G | A | manic/hyper symptoms | preeclampsia-eclampsia | -0.0125723 | 0.0388238   | 0.805009  | 0.848498  | 108169070 | 0.00303594 | 31317  | 4  | 3.50E-05 | 107247913 | 0.0881049 | 0.0227642 | 219817 | ukb-b-10002        | lfinngen_R10_015_PRE_OR_ECLAMP | TRUE |
| rs9405314  | C | T | C | T | manic/hyper symptoms | preeclampsia-eclampsia | 0.0112916  | -0.0468427  | 0.295568  | 0.24077   | 6711680   | 0.00269487 | 31317  | 6  | 2.80E-05 | 6711447   | 0.0142037 | 0.0191034 | 219817 | ukb-b-10002        | lfinngen_R10_015_PRE_OR_ECLAMP | TRUE |
| rs10994397 | T | C | T | C | bipolar disorder     | preeclampsia-eclampsia | 0.297867   | 0.0407      |           | 0.173975  | 62279124  | 0.048      | 16731  | 10 | 5.54E-10 | 62279124  | 0.3249    | 0.0413    | 267242 | ieu-a-801          | ebi-a-GCST90018906             | TRUE |
| rs12576775 | G | A | G | A | bipolar disorder     | preeclampsia-eclampsia | 0.167236   | -0.032      |           | 0.149427  | 79077193  | 0.0301     | 16731  | 11 | 2.66E-08 | 79077193  | 0.4007    | 0.038     | 267242 | ieu-a-801          | ebi-a-GCST90018906             | TRUE |
| rs6746896  | G | A | G | A | bipolar disorder     | preeclampsia-eclampsia | -0.127249  | -0.0398     | 0.2917    | 0.342212  | 97410949  | 0.0251     | 16731  | 2  | 4.20E-07 | 97410949  | 0.177     | 0.0295    | 267242 | ieu-a-801          | ebi-a-GCST90018906             | TRUE |
| rs7296288  | C | A | C | A | bipolar disorder     | preeclampsia-eclampsia | 0.137195   | 0.0165      | 0.4831    | 0.45764   | 49479968  | 0.0239     | 16731  | 12 | 9.39E-09 | 49479968  | 0.5632    | 0.0286    | 267242 | ieu-a-801          | ebi-a-GCST90018906             | TRUE |
| rs736408   | T | C | T | C | bipolar disorder     | preeclampsia-eclampsia | -0.134094  | 0.0133      | 0.3083    | 0.377009  | 52835354  | 0.0258     | 16731  | 3  | 1.99E-07 | 52835354  | 0.6568    | 0.0299    | 267242 | ieu-a-801          | ebi-a-GCST90018906             | TRUE |
| rs9371601  | T | G | T | G | bipolar disorder     | preeclampsia-eclampsia | 0.142716   | 0.0368      | 0.3333    | 0.446083  | 152790573 | 0.0243     | 16731  | 6  | 4.33E-09 | 152790573 | 0.2247    | 0.0303    | 267242 | ieu-a-801          | ebi-a-GCST90018906             | TRUE |
| rs10493901 | G | T | G | T | depression           | preeclampsia-eclampsia | -0.2924    | 0.0246      | 0.0336522 | 0.0345839 | 98833455  | 0.0617     | 449414 | 1  | 2.18E-06 | 98833455  | 0.7952    | 0.0949    | 267242 | ebi-a-GCST90018833 | ebi-a-GCST90018906             | TRUE |
| rs10957334 | A | G | A | G | depression           | preeclampsia-eclampsia | 0.0715     | -0.0133     | 0.338452  | 0.332809  | 65960510  | 0.0144     | 449414 | 8  | 7.30E-07 | 65960510  | 0.6637    | 0.0306    | 267242 | ebi-a-GCST90018833 | ebi-a-GCST90018906             | TRUE |
| rs11136497 | T | C | T | C | depression           | preeclampsia-eclampsia | 1.279      | 0.0865      | 0.0235063 | 0.0235508 | 111629006 | 0.2751     | 449414 | 1  | 3.33E-06 | 111629006 | 0.579101  | 0.1559    | 267242 | ebi-a-GCST90018833 | ebi-a-GCST90018906             | TRUE |
| rs11612711 | A | G | A | G | depression           | preeclampsia-eclampsia | 0.3078     | 0.0945      | 0.0164089 | 0.0164974 | 11816618  | 0.0653     | 449414 | 5  | 2.44E-06 | 11816618  | 0.4524    | 0.1257    | 267242 | ebi-a-GCST90018833 | ebi-a-GCST90018906             | TRUE |
| rs13417898 | C | T | C | T | depression           | preeclampsia-eclampsia | -0.0671    | -0.0272     | 0.32157   | 0.331487  | 38516428  | 0.0139     | 449414 | 2  | 1.39E-06 | 38516428  | 0.3607    | 0.0297    | 267242 | ebi-a-GCST90018833 | ebi-a-GCST90018906             | TRUE |
| rs14517651 | A | G | A | G | depression           | preeclampsia-eclampsia | 0.0843     | 0.0724      | 0.171359  | 0.170609  | 631574    | 0.0183     | 449414 | 19 | 3.90E-06 | 631574    | 0.0669993 | 0.0395    | 267242 | ebi-a-GCST90018833 | ebi-a-GCST90018906             | TRUE |
| rs17795658 | C | T | C | T | depression           | preeclampsia-eclampsia | 0.0887     | -0.0735     | 0.117269  | 0.120134  | 26830227  | 0.0191     | 449414 | 16 | 3.52E-06 | 26830227  | 0.0780297 | 0.0417    | 267242 | ebi-a-GCST90018833 | ebi-a-GCST90018906             | TRUE |

|            |   |   |   |   |                      |                        |            |           |            |           |           |            |        |    |          |           |            |        |        |                    |                    |      |
|------------|---|---|---|---|----------------------|------------------------|------------|-----------|------------|-----------|-----------|------------|--------|----|----------|-----------|------------|--------|--------|--------------------|--------------------|------|
| rs1842806  | T | C | T | C | depression           | preeclampsia-eclampsia | -0.0639    | -0.0403   | 0.669173   | 0.655248  | 43486923  | 0.0139     | 449414 | 3  | 4.63E-06 | 43486923  | 0.174      | 0.0296 | 267242 | ebi-a-GCST90018833 | ebi-a-GCST90018906 | TRUE |
| rs1856246  | G | T | G | T | depression           | preeclampsia-eclampsia | 0.0619     | -0.0307   | 0.413292   | 0.413458  | 125057899 | 0.0135     | 449414 | 6  | 4.73E-06 | 125057899 | 0.2864     | 0.0288 | 267242 | ebi-a-GCST90018833 | ebi-a-GCST90018906 | TRUE |
| rs18950424 | C | A | C | A | depression           | preeclampsia-eclampsia | 0.22       | -0.0213   | 0.027041   | 0.0271927 | 155887039 | 0.0478     | 449414 | 6  | 4.09E-06 | 155887039 | 0.8286     | 0.0982 | 267242 | ebi-a-GCST90018833 | ebi-a-GCST90018906 | TRUE |
| rs2046918  | A | G | A | G | depression           | preeclampsia-eclampsia | 0.0717     | 0.0383    | 0.297229   | 0.291682  | 191887975 | 0.0155     | 449414 | 3  | 3.88E-06 | 191887975 | 0.244      | 0.0329 | 267242 | ebi-a-GCST90018833 | ebi-a-GCST90018906 | TRUE |
| rs34608209 | T | G | T | G | depression           | preeclampsia-eclampsia | 0.5941     | -0.0675   | 0.00532435 | 0.0053259 | 38569012  | 0.1282     | 449414 | 1  | 3.61E-06 | 38569012  | 0.7734     | 0.2346 | 267242 | ebi-a-GCST90018833 | ebi-a-GCST90018906 | TRUE |
| rs35130355 | T | C | T | C | depression           | preeclampsia-eclampsia | -0.0635    | -0.0255   | 0.481135   | 0.470197  | 208329196 | 0.0137     | 449414 | 2  | 3.49E-06 | 208329196 | 0.385      | 0.0293 | 267242 | ebi-a-GCST90018833 | ebi-a-GCST90018906 | TRUE |
| rs4962579  | T | C | T | C | depression           | preeclampsia-eclampsia | 0.0723     | 0.0243    | 0.517175   | 0.531055  | 126156923 | 0.014      | 449414 | 10 | 2.47E-07 | 126156923 | 0.4097     | 0.0295 | 267242 | ebi-a-GCST90018833 | ebi-a-GCST90018906 | TRUE |
| rs6668851  | A | C | A | C | depression           | preeclampsia-eclampsia | -0.0682    | 0.0071    | 0.663019   | 0.67574   | 226545866 | 0.014      | 449414 | 1  | 1.03E-06 | 226545866 | 0.8161     | 0.0307 | 267242 | ebi-a-GCST90018833 | ebi-a-GCST90018906 | TRUE |
| rs73487503 | T | C | T | C | depression           | preeclampsia-eclampsia | 0.1164     | 0.0722    | 0.0907471  | 0.0904097 | 40856982  | 0.0233     | 449414 | 18 | 5.72E-07 | 40856982  | 0.157      | 0.051  | 267242 | ebi-a-GCST90018833 | ebi-a-GCST90018906 | TRUE |
| rs74702231 | T | A | T | A | depression           | preeclampsia-eclampsia | 0.0787     | 0.0062    | 0.145008   | 0.151924  | 4817433   | 0.0169     | 449414 | 16 | 3.07E-06 | 4817433   | 0.8678     | 0.0371 | 267242 | ebi-a-GCST90018833 | ebi-a-GCST90018906 | TRUE |
| rs7835373  | A | G | A | G | depression           | preeclampsia-eclampsia | 0.0846     | 0.036     | 0.227066   | 0.223124  | 78362277  | 0.0184     | 449414 | 8  | 4.21E-06 | 78362277  | 0.3226     | 0.0364 | 267242 | ebi-a-GCST90018833 | ebi-a-GCST90018906 | TRUE |
| rs7920460  | T | C | T | C | depression           | preeclampsia-eclampsia | 0.0978     | -0.0243   | 0.178569   | 0.163837  | 80838651  | 0.0202     | 449414 | 10 | 1.29E-06 | 80838651  | 0.578599   | 0.0438 | 267242 | ebi-a-GCST90018833 | ebi-a-GCST90018906 | TRUE |
| rs8061978  | T | C | T | C | depression           | preeclampsia-eclampsia | 0.0692     | -0.014    | 0.247228   | 0.246104  | 73140324  | 0.0151     | 449414 | 16 | 4.34E-06 | 73140324  | 0.6784     | 0.0338 | 267242 | ebi-a-GCST90018833 | ebi-a-GCST90018906 | TRUE |
| rs916241   | C | T | C | T | depression           | preeclampsia-eclampsia | -0.0755    | -0.0085   | 0.833011   | 0.824089  | 49700618  | 0.0162     | 449414 | 22 | 3.15E-06 | 49700618  | 0.81       | 0.0355 | 267242 | ebi-a-GCST90018833 | ebi-a-GCST90018906 | TRUE |
| rs9498371  | C | T | C | T | depression           | preeclampsia-eclampsia | 0.0666     | 0.0799    | 0.47302    | 0.452996  | 149884597 | 0.0138     | 449414 | 6  | 1.43E-06 | 149884597 | 0.00707506 | 0.0297 | 267242 | ebi-a-GCST90018833 | ebi-a-GCST90018906 | TRUE |
| rs10036272 | T | C | T | C | manic/hyper symptoms | preeclampsia-eclampsia | 0.014218   | 0.0342    | 0.775676   | 0.666017  | 180130876 | 0.00294265 | 31317  | 5  | 1.40E-06 | 180130876 | 0.312      | 0.0338 | 267242 | ukb-b-10002        | ebi-a-GCST90018906 | TRUE |
| rs10148448 | A | G | A | G | manic/hyper symptoms | preeclampsia-eclampsia | 0.0134566  | -3.00E-04 | 0.249549   | 0.200677  | 101026148 | 0.00280614 | 31317  | 14 | 1.60E-06 | 101026148 | 0.9925     | 0.0343 | 267242 | ukb-b-10002        | ebi-a-GCST90018906 | TRUE |
| rs11712949 | A | T | A | T | manic/hyper symptoms | preeclampsia-eclampsia | 0.0109814  | -0.0242   | 0.288435   | 0.281833  | 63504643  | 0.00268497 | 31317  | 3  | 4.30E-05 | 63504643  | 0.4459     | 0.0318 | 267242 | ukb-b-10002        | ebi-a-GCST90018906 | TRUE |
| rs12110199 | T | C | T | C | manic/hyper symptoms | preeclampsia-eclampsia | -0.0132326 | 0.0117    | 0.219023   | 0.184867  | 171975508 | 0.00295781 | 31317  | 5  | 7.70E-06 | 171975508 | 0.748101   | 0.0363 | 267242 | ukb-b-10002        | ebi-a-GCST90018906 | TRUE |
| rs12222810 | T | C | T | C | manic/hyper symptoms | preeclampsia-eclampsia | 0.0150598  | 0.0624    | 0.126      | 0.231283  | 124816420 | 0.00366631 | 31317  | 11 | 4.00E-05 | 124816420 | 0.1169     | 0.0398 | 267242 | ukb-b-10002        | ebi-a-GCST90018906 | TRUE |
| rs13084980 | T | C | T | C | manic/hyper symptoms | preeclampsia-eclampsia | 0.0113628  | 0.0282    | 0.269466   | 0.236028  | 189127455 | 0.00273599 | 31317  | 3  | 3.30E-05 | 189127455 | 0.3832     | 0.0323 | 267242 | ukb-b-10002        | ebi-a-GCST90018906 | TRUE |
| rs13110183 | A | G | A | G | manic/hyper symptoms | preeclampsia-eclampsia | -0.0103515 | 0.0074    | 0.387015   | 0.471937  | 156952899 | 0.00247977 | 31317  | 4  | 3.00E-05 | 156952899 | 0.7984     | 0.0289 | 267242 | ukb-b-10002        | ebi-a-GCST90018906 | TRUE |
| rs1443871  | T | C | T | C | manic/hyper symptoms | preeclampsia-eclampsia | -0.0103086 | 0.0279    | 0.522457   | 0.606745  | 80091453  | 0.00240994 | 31317  | 9  | 1.90E-05 | 80091453  | 0.3411     | 0.0293 | 267242 | ukb-b-10002        | ebi-a-GCST90018906 | TRUE |
| rs1529306  | T | C | T | C | manic/hyper symptoms | preeclampsia-eclampsia | -0.0106828 | 0.0079    | 0.338559   | 0.41634   | 168404458 | 0.00255721 | 31317  | 2  | 2.90E-05 | 168404458 | 0.7978     | 0.031  | 267242 | ukb-b-10002        | ebi-a-GCST90018906 | TRUE |
| rs177770   | C | A | C | A | manic/hyper symptoms | preeclampsia-eclampsia | -0.0103705 | -0.0044   | 0.638716   | 0.69653   | 3663825   | 0.00251484 | 31317  | 4  | 3.70E-05 | 3663825   | 0.885      | 0.0304 | 267242 | ukb-b-10002        | ebi-a-GCST90018906 | TRUE |
| rs1806201  | A | G | A | G | manic/hyper symptoms | preeclampsia-eclampsia | 0.0127571  | -0.0407   | 0.270501   | 0.337752  | 13717508  | 0.00271198 | 31317  | 12 | 2.60E-06 | 13717508  | 0.1786     | 0.0303 | 267242 | ukb-b-10002        | ebi-a-GCST90018906 | TRUE |
| rs2059725  | A | G | A | G | manic/hyper symptoms | preeclampsia-eclampsia | -0.0110375 | 0.0216    | 0.677594   | 0.669257  | 109359052 | 0.00259783 | 31317  | 2  | 2.10E-05 | 109359052 | 0.4956     | 0.0317 | 267242 | ukb-b-10002        | ebi-a-GCST90018906 | TRUE |
| rs2279945  | A | C | A | C | manic/hyper symptoms | preeclampsia-eclampsia | 0.0133564  | 0.0051    | 0.176808   | 0.221462  | 200952422 | 0.00314944 | 31317  | 1  | 2.20E-05 | 200952422 | 0.8832     | 0.0344 | 267242 | ukb-b-10002        | ebi-a-GCST90018906 | TRUE |
| rs2817666  | A | G | A | G | manic/hyper symptoms | preeclampsia-eclampsia | -0.010278  | -0.0136   | 0.418064   | 0.434044  | 98933853  | 0.00245263 | 31317  | 10 | 2.80E-05 | 98933853  | 0.641899   | 0.0293 | 267242 | ukb-b-10002        | ebi-a-GCST90018906 | TRUE |
| rs28396295 | T | G | T | G | manic/hyper symptoms | preeclampsia-eclampsia | 0.0101724  | -0.023    | 0.444503   | 0.424407  | 131395712 | 0.00242666 | 31317  | 8  | 2.80E-05 | 131395712 | 0.422      | 0.0287 | 267242 | ukb-b-10002        | ebi-a-GCST90018906 | TRUE |
| rs302164   | A | G | A | G | manic/hyper symptoms | preeclampsia-eclampsia | -0.01353   | -0.0809   | 0.811559   | 0.802049  | 18325674  | 0.00307688 | 31317  | 7  | 1.10E-05 | 18325674  | 0.0216401  | 0.0352 | 267242 | ukb-b-10002        | ebi-a-GCST90018906 | TRUE |
| rs34025630 | T | C | T | C | manic/hyper symptoms | preeclampsia-eclampsia | 0.0140517  | -0.0215   | 0.167848   | 0.181095  | 11768444  | 0.00323807 | 31317  | 11 | 1.40E-05 | 11768444  | 0.5579     | 0.0367 | 267242 | ukb-b-10002        | ebi-a-GCST90018906 | TRUE |
| rs34087764 | A | G | A | G | manic/hyper symptoms | preeclampsia-eclampsia | 0.0114222  | -0.0037   | 0.27       | 0.280337  | 79409739  | 0.00273915 | 31317  | 9  | 3.00E-05 | 79409739  | 0.9106     | 0.0328 | 267242 | ukb-b-10002        | ebi-a-GCST90018906 | TRUE |
| rs358227   | G | A | G | A | manic/hyper symptoms | preeclampsia-eclampsia | -0.0143387 | -0.0285   | 0.851961   | 0.832167  | 22823651  | 0.00339059 | 31317  | 4  | 2.30E-05 | 22823651  | 0.465      | 0.0391 | 267242 | ukb-b-10002        | ebi-a-GCST90018906 | TRUE |
| rs418979   | G | A | G | A | manic/hyper symptoms | preeclampsia-eclampsia | 0.0104147  | -0.0396   | 0.48718    | 0.476906  | 86228343  | 0.00240551 | 31317  | 1  | 1.50E-05 | 86228343  | 0.1662     | 0.0286 | 267242 | ukb-b-10002        | ebi-a-GCST90018906 | TRUE |
| rs4446570  | T | C | T | C | manic/hyper symptoms | preeclampsia-eclampsia | -0.0151565 | 0.0353    | 0.85971    | 0.866602  | 43782977  | 0.00353415 | 31317  | 6  | 1.80E-05 | 43782977  | 0.3911     | 0.0411 | 267242 | ukb-b-10002        | ebi-a-GCST90018906 | TRUE |
| rs450266   | A | C | A | C | manic/hyper symptoms | preeclampsia-eclampsia | 0.0108891  | 0.0665    | 0.640762   | 0.654846  | 62575738  | 0.00251698 | 31317  | 5  | 1.50E-05 | 62575738  | 0.0250398  | 0.0297 | 267242 | ukb-b-10002        | ebi-a-GCST90018906 | TRUE |
| rs4866447  | A | G | A | G | manic/hyper symptoms | preeclampsia-eclampsia | -0.013221  | 0.0148    | 0.234311   | 0.258134  | 3454482   | 0.00288045 | 31317  | 5  | 4.40E-06 | 3454482   | 0.665701   | 0.0343 | 267242 | ukb-b-10002        | ebi-a-GCST90018906 | TRUE |
| rs4949324  | A | G | A | G | manic/hyper symptoms | preeclampsia-eclampsia | -0.0116202 | 0.0566    | 0.674761   | 0.7218    | 31377743  | 0.0025671  | 31317  | 1  | 6.00E-06 | 31377743  | 0.0808705  | 0.0324 | 267242 | ukb-b-10002        | ebi-a-GCST90018906 | TRUE |
| rs6439441  | G | A | G | A | manic/hyper symptoms | preeclampsia-eclampsia | -0.0101716 | 0.0808    | 0.537874   | 0.567214  | 133529594 | 0.00243175 | 31317  | 3  | 2.90E-05 | 133529594 | 0.00493696 | 0.0287 | 267242 | ukb-b-10002        | ebi-a-GCST90018906 | TRUE |
| rs67629630 | A | G | A | G | manic/hyper symptoms | preeclampsia-eclampsia | -0.0121482 | 0.0355    | 0.29258    | 0.305355  | 75632086  | 0.0026764  | 31317  | 17 | 5.70E-06 | 75632086  | 0.2709     | 0.0323 | 267242 | ukb-b-10002        | ebi-a-GCST90018906 | TRUE |
| rs72915525 | T | G | T | G | manic/hyper symptoms | preeclampsia-eclampsia | 0.0144257  | 0.0305    | 0.144713   | 0.108781  | 45880255  | 0.0034441  | 31317  | 18 | 2.80E-05 | 45880255  | 0.4945     | 0.0447 | 267242 | ukb-b-10002        | ebi-a-GCST90018906 | TRUE |
| rs7326804  | T | G | T | G | manic/hyper symptoms | preeclampsia-eclampsia | -0.0116908 | 0.0163    | 0.73083    | 0.763637  | 30310382  | 0.0027359  | 31317  | 13 | 1.90E-05 | 30310382  | 0.6195     | 0.0328 | 267242 | ukb-b-10002        | ebi-a-GCST90018906 | TRUE |

|            |   |   |   |   |                                             |             |              |            |           |           |             |        |    |           |           |            |         |        |                                           |                    |      |
|------------|---|---|---|---|---------------------------------------------|-------------|--------------|------------|-----------|-----------|-------------|--------|----|-----------|-----------|------------|---------|--------|-------------------------------------------|--------------------|------|
| rs736253   | T | C | T | C | manic/hyper symptoms preeclampsia-eclampsia | -0. 011063  | 0. 0089      | 0. 368817  | 0. 416813 | 93072009  | 0. 0025031  | 31317  | 9  | 9. 90E-06 | 93072009  | 0. 760001  | 0. 029  | 267242 | ukb-b-10002                               | ebi-a-GCST90018906 | TRUE |
| rs74078208 | C | T | C | T | manic/hyper symptoms preeclampsia-eclampsia | 0. 0109013  | 0. 0095      | 0. 339167  | 0. 327993 | 98499682  | 0. 0025568  | 31317  | 14 | 2. 00E-05 | 98499682  | 0. 754401  | 0. 0305 | 267242 | ukb-b-10002                               | ebi-a-GCST90018906 | TRUE |
| rs7905367  | C | G | C | G | manic/hyper symptoms preeclampsia-eclampsia | 0. 0136682  | -0. 0396     | 0. 796245  | 0. 615109 | 54334653  | 0. 00300029 | 31317  | 10 | 5. 20E-06 | 54334653  | 0. 2537    | 0. 0347 | 267242 | ukb-b-10002                               | ebi-a-GCST90018906 | TRUE |
| rs923744   | G | A | G | A | manic/hyper symptoms preeclampsia-eclampsia | -0. 0125723 | -0. 058      | 0. 805009  | 0. 794779 | 108169070 | 0. 00303594 | 31317  | 4  | 3. 50E-05 | 108169070 | 0. 1192    | 0. 0372 | 267242 | ukb-b-10002                               | ebi-a-GCST90018906 | TRUE |
| rs9405314  | C | T | C | T | manic/hyper symptoms preeclampsia-eclampsia | 0. 0112916  | -0. 006      | 0. 295568  | 0. 255757 | 6711680   | 0. 00269487 | 31317  | 6  | 2. 80E-05 | 6711680   | 0. 8547    | 0. 033  | 267242 | ukb-b-10002                               | ebi-a-GCST90018906 | TRUE |
| rs10103355 | G | A | G | A | preeclampsia-eclampsia bipolar disorder     | -0. 196017  | 0. 00180162  | 0. 96845   | 0. 98333  | 18061425  | 0. 043638   | 219817 | 8  | 7. 06E-06 | 17918934  | 0. 9893    | 0. 1339 | 16731  | lfinngen_R10_015_PRE_OR_ECLAMP\$ieu-a-801 | TRUE               |      |
| rs10155829 | T | C | T | C | preeclampsia-eclampsia bipolar disorder     | 0. 118858   | -0. 0854435  | 0. 089511  | 0. 1333   | 27332310  | 0. 0276502  | 219817 | 7  | 1. 72E-05 | 27371929  | 0. 0647307 | 0. 0463 | 16731  | lfinngen_R10_015_PRE_OR_ECLAMP\$ieu-a-801 | TRUE               |      |
| rs1017748  | C | T | C | T | preeclampsia-eclampsia bipolar disorder     | 0. 0658313  | -0. 0229616  | 0. 502148  | 0. 4417   | 75816601  | 0. 0161752  | 219817 | 18 | 4. 70E-05 | 73528556  | 0. 3266    | 0. 0234 | 16731  | lfinngen_R10_015_PRE_OR_ECLAMP\$ieu-a-801 | TRUE               |      |
| rs10510658 | T | C | T | C | preeclampsia-eclampsia bipolar disorder     | 0. 0675686  | 0. 0419685   | 0. 531792  | 0. 5667   | 34180697  | 0. 0162958  | 219817 | 3  | 3. 38E-05 | 34222189  | 0. 0758997 | 0. 0236 | 16731  | lfinngen_R10_015_PRE_OR_ECLAMP\$ieu-a-801 | TRUE               |      |
| rs10521280 | G | A | G | A | preeclampsia-eclampsia bipolar disorder     | 0. 0717125  | 0. 00410843  | 0. 339177  | 0. 325    | 14742585  | 0. 0170933  | 219817 | 17 | 2. 72E-05 | 14645902  | 0. 9094    | 0. 0362 | 16731  | lfinngen_R10_015_PRE_OR_ECLAMP\$ieu-a-801 | TRUE               |      |
| rs10745798 | G | A | G | A | preeclampsia-eclampsia bipolar disorder     | 0. 0963937  | 0. 0400931   | 0. 837046  | 0. 8583   | 97477602  | 0. 0225544  | 219817 | 12 | 1. 92E-05 | 97871380  | 0. 2893    | 0. 0379 | 16731  | lfinngen_R10_015_PRE_OR_ECLAMP\$ieu-a-801 | TRUE               |      |
| rs11155987 | A | G | A | G | preeclampsia-eclampsia bipolar disorder     | -0. 0816026 | 0. 0230327   | 0. 263297  | 0. 275    | 154612142 | 0. 0186408  | 219817 | 6  | 1. 20E-05 | 154933276 | 0. 4149    | 0. 0283 | 16731  | lfinngen_R10_015_PRE_OR_ECLAMP\$ieu-a-801 | TRUE               |      |
| rs1155321  | A | G | A | G | preeclampsia-eclampsia bipolar disorder     | 0. 123901   | 0. 147471    | 0. 0887837 | 0. 1441   | 171130133 | 0. 0282479  | 219817 | 4  | 1. 15E-05 | 172051284 | 0. 0213698 | 0. 0641 | 16731  | lfinngen_R10_015_PRE_OR_ECLAMP\$ieu-a-801 | TRUE               |      |
| rs11664792 | A | G | A | G | preeclampsia-eclampsia bipolar disorder     | 0. 223794   | -0. 0541394  | 0. 0228882 | 0. 02632  | 480875    | 0. 0511587  | 219817 | 18 | 1. 22E-05 | 480875    | 0. 2805    | 0. 0501 | 16731  | lfinngen_R10_015_PRE_OR_ECLAMP\$ieu-a-801 | TRUE               |      |
| rs11920006 | T | C | T | C | preeclampsia-eclampsia bipolar disorder     | 0. 0695018  | 0. 00924258  | 0. 46294   | 0. 4583   | 100499139 | 0. 0162321  | 219817 | 3  | 1. 85E-05 | 100217983 | 0. 695     | 0. 0237 | 16731  | lfinngen_R10_015_PRE_OR_ECLAMP\$ieu-a-801 | TRUE               |      |
| rs12245784 | C | G | C | G | preeclampsia-eclampsia bipolar disorder     | -0. 0766152 | 0. 040662    | 0. 300884  | 0. 2155   | 35916375  | 0. 0182945  | 219817 | 10 | 2. 82E-05 | 36205303  | 0. 551501  | 0. 0683 | 16731  | lfinngen_R10_015_PRE_OR_ECLAMP\$ieu-a-801 | TRUE               |      |
| rs12477687 | T | C | T | C | preeclampsia-eclampsia bipolar disorder     | -0. 067879  | -0. 0337249  | 0. 428706  | 0. 4237   | 67729934  | 0. 0164715  | 219817 | 2  | 3. 77E-05 | 67957066  | 0. 1507    | 0. 0235 | 16731  | lfinngen_R10_015_PRE_OR_ECLAMP\$ieu-a-801 | TRUE               |      |
| rs12915312 | C | G | C | G | preeclampsia-eclampsia bipolar disorder     | -0. 076742  | -0. 0254204  | 0. 25764   | 0. 2627   | 62603276  | 0. 018782   | 219817 | 15 | 4. 39E-05 | 62895475  | 0. 3474    | 0. 027  | 16731  | lfinngen_R10_015_PRE_OR_ECLAMP\$ieu-a-801 | TRUE               |      |
| rs13194642 | T | C | T | C | preeclampsia-eclampsia bipolar disorder     | -0. 148199  | 0. 0758017   | 0. 083837  | 0. 06667  | 32243918  | 0. 0305113  | 219817 | 6  | 1. 19E-06 | 32211695  | 0. 0321403 | 0. 0354 | 16731  | lfinngen_R10_015_PRE_OR_ECLAMP\$ieu-a-801 | TRUE               |      |
| rs1328690  | C | G | C | G | preeclampsia-eclampsia bipolar disorder     | -0. 0742767 | 0. 0028958   | 0. 728646  | 0. 8167   | 3461283   | 0. 0180475  | 219817 | 6  | 3. 86E-05 | 3461517   | 0. 9172    | 0. 0281 | 16731  | lfinngen_R10_015_PRE_OR_ECLAMP\$ieu-a-801 | TRUE               |      |
| rs1434218  | G | A | G | A | preeclampsia-eclampsia bipolar disorder     | 0. 0752478  | 0. 0103534   | 0. 723541  | 0. 625    | 79328221  | 0. 0185098  | 219817 | 2  | 4. 80E-05 | 79555347  | 0. 7796    | 0. 0368 | 16731  | lfinngen_R10_015_PRE_OR_ECLAMP\$ieu-a-801 | TRUE               |      |
| rs1531335  | T | C | T | C | preeclampsia-eclampsia bipolar disorder     | 0. 0795448  | 0. 0159262   | 0. 71254   | 0. 661    | 150245085 | 0. 0181688  | 219817 | 4  | 1. 20E-05 | 151166237 | 0. 5231    | 0. 025  | 16731  | lfinngen_R10_015_PRE_OR_ECLAMP\$ieu-a-801 | TRUE               |      |
| rs167479   | G | T | G | T | preeclampsia-eclampsia bipolar disorder     | 0. 0988855  | -0. 00883895 | 0. 574598  |           | 11416089  | 0. 0164943  | 219817 | 19 | 2. 03E-09 | 11526765  | 0. 8856    | 0. 0615 | 16731  | lfinngen_R10_015_PRE_OR_ECLAMP\$ieu-a-801 | TRUE               |      |
| rs16941647 | A | G | A | G | preeclampsia-eclampsia bipolar disorder     | 0. 197804   | 0. 0244975   | 0. 0311632 | 0. 025    | 86612058  | 0. 044102   | 219817 | 16 | 7. 29E-06 | 86645664  | 0. 7188    | 0. 0679 | 16731  | lfinngen_R10_015_PRE_OR_ECLAMP\$ieu-a-801 | TRUE               |      |
| rs1756294  | G | A | G | A | preeclampsia-eclampsia bipolar disorder     | 0. 086528   | -0. 088194   | 0. 796242  | 0. 8707   | 83986115  | 0. 0205158  | 219817 | 14 | 2. 47E-05 | 84452459  | 0. 02063   | 0. 0381 | 16731  | lfinngen_R10_015_PRE_OR_ECLAMP\$ieu-a-801 | TRUE               |      |
| rs1874490  | C | T | C | T | preeclampsia-eclampsia bipolar disorder     | 0. 116139   | 0. 00369317  | 0. 146419  | 0. 125    | 31343072  | 0. 0224718  | 219817 | 19 | 2. 36E-07 | 31833978  | 0. 9153    | 0. 0346 | 16731  | lfinngen_R10_015_PRE_OR_ECLAMP\$ieu-a-801 | TRUE               |      |
| rs2215141  | C | T | C | T | preeclampsia-eclampsia bipolar disorder     | 0. 0712475  | 0. 024595    | 0. 459899  | 0. 4333   | 108603790 | 0. 0162702  | 219817 | 7  | 1. 19E-05 | 108244234 | 0. 2854    | 0. 0231 | 16731  | lfinngen_R10_015_PRE_OR_ECLAMP\$ieu-a-801 | TRUE               |      |
| rs2216752  | A | G | A | G | preeclampsia-eclampsia bipolar disorder     | 0. 0754529  | -0. 0307685  | 0. 715299  | 0. 7797   | 96849764  | 0. 0182319  | 219817 | 5  | 3. 50E-05 | 96185467  | 0. 2522    | 0. 0269 | 16731  | lfinngen_R10_015_PRE_OR_ECLAMP\$ieu-a-801 | TRUE               |      |
| rs2217884  | C | T | C | T | preeclampsia-eclampsia bipolar disorder     | -0. 0732454 | 0. 0324672   | 0. 379465  | 0. 4831   | 24425711  | 0. 0168763  | 219817 | 3  | 1. 42E-05 | 24467202  | 0. 1709    | 0. 0237 | 16731  | lfinngen_R10_015_PRE_OR_ECLAMP\$ieu-a-801 | TRUE               |      |
| rs2722990  | T | G | T | G | preeclampsia-eclampsia bipolar disorder     | 0. 14786    | -0. 100298   | 0. 935887  | 0. 95     | 83472168  | 0. 0345365  | 219817 | 7  | 1. 86E-05 | 83101484  | 0. 0484395 | 0. 0508 | 16731  | lfinngen_R10_015_PRE_OR_ECLAMP\$ieu-a-801 | TRUE               |      |
| rs4245909  | G | A | G | A | preeclampsia-eclampsia bipolar disorder     | -0. 0819374 | -0. 0174469  | 0. 500251  | 0. 5259   | 169455000 | 0. 0162852  | 219817 | 3  | 4. 87E-07 | 169172788 | 0. 4653    | 0. 0239 | 16731  | lfinngen_R10_015_PRE_OR_ECLAMP\$ieu-a-801 | TRUE               |      |
| rs4668606  | T | C | T | C | preeclampsia-eclampsia bipolar disorder     | 0. 0689083  | -0. 00169856 | 0. 628468  | 0. 625    | 9148234   | 0. 0169151  | 219817 | 2  | 4. 63E-05 | 9288363   | 0. 944     | 0. 0248 | 16731  | lfinngen_R10_015_PRE_OR_ECLAMP\$ieu-a-801 | TRUE               |      |
| rs4712742  | T | C | T | C | preeclampsia-eclampsia bipolar disorder     | 0. 141868   | -0. 00249688 | 0. 0689898 | 0. 1017   | 23171586  | 0. 0308437  | 219817 | 6  | 4. 23E-06 | 23171814  | 0. 9503    | 0. 0404 | 16731  | lfinngen_R10_015_PRE_OR_ECLAMP\$ieu-a-801 | TRUE               |      |
| rs496300   | T | C | T | C | preeclampsia-eclampsia bipolar disorder     | 0. 0756159  | -0. 0412379  | 0. 544885  | 0. 5593   | 43359800  | 0. 0163587  | 219817 | 21 | 3. 79E-06 | 44779680  | 0. 1908    | 0. 0315 | 16731  | lfinngen_R10_015_PRE_OR_ECLAMP\$ieu-a-801 | TRUE               |      |
| rs6546096  | G | A | G | A | preeclampsia-eclampsia bipolar disorder     | -0. 0843183 | 0. 0329365   | 0. 777299  | 0. 775    | 64679161  | 0. 0192144  | 219817 | 2  | 1. 14E-05 | 64906295  | 0. 2116    | 0. 0263 | 16731  | lfinngen_R10_015_PRE_OR_ECLAMP\$ieu-a-801 | TRUE               |      |
| rs6985457  | T | G | T | G | preeclampsia-eclampsia bipolar disorder     | 0. 175669   | -0. 059683   | 0. 033853  |           | 120805973 | 0. 0428253  | 219817 | 8  | 4. 10E-05 | 121818213 | 0. 6242    | 0. 1219 | 16731  | lfinngen_R10_015_PRE_OR_ECLAMP\$ieu-a-801 | TRUE               |      |
| rs7043897  | C | T | C | T | preeclampsia-eclampsia bipolar disorder     | 0. 072442   | 0. 0028958   | 0. 366551  | 0. 4583   | 79351161  | 0. 0167636  | 219817 | 9  | 1. 55E-05 | 81966076  | 0. 9032    | 0. 0239 |        |                                           |                    |      |



|            |   |   |   |   |                                             |            |             |           |           |           |           |        |    |          |           |            |            |        |                                                    |           |      |
|------------|---|---|---|---|---------------------------------------------|------------|-------------|-----------|-----------|-----------|-----------|--------|----|----------|-----------|------------|------------|--------|----------------------------------------------------|-----------|------|
| rs11642001 | T | C | T | C | preeclampsia-eclampsia depression           | -0.415317  | 6.00E-04    | 0.0131511 | 0.0144654 | 54955481  | 0.080371  | 219817 | 2  | 2.37E-07 | 55182618  | 0.9916     | 0.0606     | 449414 | lfinngen_R10_015_PRE_OR_ECLAMP\$ebi-a-GCST90018833 | TRUE      |      |
| rs11715561 | A | G | A | G | preeclampsia-eclampsia depression           | -0.0841969 | 0.0089      | 0.631091  | 0.601288  | 112066361 | 0.0166968 | 219817 | 3  | 4.59E-07 | 111785208 | 0.523701   | 0.0139     | 449414 | lfinngen_R10_015_PRE_OR_ECLAMP\$ebi-a-GCST90018833 | TRUE      |      |
| rs11908189 | C | T | C | T | preeclampsia-eclampsia depression           | 0.116147   | 0.0068      | 0.165369  | 0.13308   | 59169816  | 0.0213078 | 219817 | 20 | 5.01E-08 | 57744871  | 0.717      | 0.0188     | 449414 | lfinngen_R10_015_PRE_OR_ECLAMP\$ebi-a-GCST90018833 | TRUE      |      |
| rs12509595 | C | T | C | T | preeclampsia-eclampsia depression           | 0.126288   | 0.0276      | 0.312093  | 0.298285  | 80261400  | 0.0173201 | 219817 | 4  | 3.07E-13 | 81182554  | 0.0574302  | 0.0145     | 449414 | lfinngen_R10_015_PRE_OR_ECLAMP\$ebi-a-GCST90018833 | TRUE      |      |
| rs12567119 | T | C | T | C | preeclampsia-eclampsia depression           | -0.138849  | 0.0937      | 0.145056  | 0.163797  | 11823474  | 0.0238158 | 219817 | 1  | 5.54E-09 | 11883531  | 0.3265     | 0.0955     | 449414 | lfinngen_R10_015_PRE_OR_ECLAMP\$ebi-a-GCST90018833 | TRUE      |      |
| rs14846285 | C | A | C | A | preeclampsia-eclampsia depression           | 0.215479   | -0.0501     | 0.0335659 | 0.0223108 | 62430639  | 0.0426963 | 219817 | 18 | 4.49E-07 | 60097872  | 0.2041     | 0.0395     | 449414 | lfinngen_R10_015_PRE_OR_ECLAMP\$ebi-a-GCST90018833 | TRUE      |      |
| rs167479   | G | T | G | T | preeclampsia-eclampsia depression           | 0.0988855  | 0.0138      | 0.574598  | 0.530582  | 11416089  | 0.0164943 | 219817 | 19 | 2.03E-09 | 11526765  | 0.3132     | 0.0137     | 449414 | lfinngen_R10_015_PRE_OR_ECLAMP\$ebi-a-GCST90018833 | TRUE      |      |
| rs1874490  | C | T | C | T | preeclampsia-eclampsia depression           | 0.116139   | 0.0604      | 0.146419  | 0.106099  | 31343072  | 0.0224718 | 219817 | 19 | 2.36E-07 | 31833978  | 0.00212598 | 0.0196     | 449414 | lfinngen_R10_015_PRE_OR_ECLAMP\$ebi-a-GCST90018833 | TRUE      |      |
| rs19251142 | G | T | G | T | preeclampsia-eclampsia depression           | -0.316185  | -0.0517     | 0.0207198 | 0.0110932 | 30339101  | 0.0622934 | 219817 | 4  | 3.86E-07 | 30340723  | 0.2869     | 0.0485     | 449414 | lfinngen_R10_015_PRE_OR_ECLAMP\$ebi-a-GCST90018833 | TRUE      |      |
| rs4245909  | G | A | G | A | preeclampsia-eclampsia depression           | -0.0819374 | -0.0195     | 0.500251  | 0.587402  | 169455000 | 0.0162852 | 219817 | 3  | 4.87E-07 | 169172788 | 0.1534     | 0.0136     | 449414 | lfinngen_R10_015_PRE_OR_ECLAMP\$ebi-a-GCST90018833 | TRUE      |      |
| rs73412716 | T | G | T | G | preeclampsia-eclampsia depression           | -0.153615  | 0.1342      | 0.108084  | 0.106474  | 112107393 | 0.0272793 | 219817 | 12 | 1.79E-08 | 112545197 | 0.0305401  | 0.0621     | 449414 | lfinngen_R10_015_PRE_OR_ECLAMP\$ebi-a-GCST90018833 | TRUE      |      |
| rs9265628  | C | T | C | T | preeclampsia-eclampsia depression           | 0.105895   | 0.0101      | 0.248956  | 0.161488  | 31332122  | 0.0184438 | 219817 | 6  | 9.38E-09 | 31299899  | 0.5583     | 0.0172     | 449414 | lfinngen_R10_015_PRE_OR_ECLAMP\$ebi-a-GCST90018833 | TRUE      |      |
| rs11715561 | A | G | A | G | preeclampsia-eclampsia manic/hyper symptoms | -0.0841969 | 0.000212399 | 0.631091  | 0.590266  | 112066361 | 0.0166968 | 219817 | 3  | 4.59E-07 | 111785208 | 0.93       | 0.00243951 | 31317  | lfinngen_R10_015_PRE_OR_ECLAMP\$ukb-b-10002        | TRUE      |      |
| rs11908189 | C | T | C | T | preeclampsia-eclampsia manic/hyper symptoms | 0.116147   | 0.000232919 | 0.165369  | 0.121477  | 59169816  | 0.0213078 | 219817 | 20 | 5.01E-08 | 57744871  | 0.95       | 0.00371506 | 31317  | lfinngen_R10_015_PRE_OR_ECLAMP\$ukb-b-10002        | TRUE      |      |
| rs12509595 | C | T | C | T | preeclampsia-eclampsia manic/hyper symptoms | 0.126288   | -0.00294477 | 0.312093  | 0.289622  | 80261400  | 0.0173201 | 219817 | 4  | 3.07E-13 | 81182554  | 0.27       | 0.00265958 | 31317  | lfinngen_R10_015_PRE_OR_ECLAMP\$ukb-b-10002        | TRUE      |      |
| rs12567119 | T | C | T | C | preeclampsia-eclampsia manic/hyper symptoms | -0.138849  | 0.00277258  | 0.145056  | 0.161858  | 11823474  | 0.0238158 | 219817 | 1  | 5.54E-09 | 11883531  | 0.4        | 0.00328726 | 31317  | lfinngen_R10_015_PRE_OR_ECLAMP\$ukb-b-10002        | TRUE      |      |
| rs167479   | G | T | G | T | preeclampsia-eclampsia manic/hyper symptoms | 0.0988855  | 0.0024329   | 0.574598  | 0.526359  | 11416089  | 0.0164943 | 219817 | 19 | 2.03E-09 | 11526765  | 0.31       | 0.00241685 | 31317  | lfinngen_R10_015_PRE_OR_ECLAMP\$ukb-b-10002        | TRUE      |      |
| rs1874490  | C | T | C | T | preeclampsia-eclampsia manic/hyper symptoms | 0.116139   | 0.00498227  | 0.146419  | 0.136164  | 31343072  | 0.0224718 | 219817 | 19 | 2.36E-07 | 31833978  | 0.16       | 0.0035107  | 31317  | lfinngen_R10_015_PRE_OR_ECLAMP\$ukb-b-10002        | TRUE      |      |
| rs4245909  | G | A | G | A | preeclampsia-eclampsia manic/hyper symptoms | -0.0819374 | -0.00302449 | 0.500251  | 0.509937  | 169455000 | 0.0162852 | 219817 | 3  | 4.87E-07 | 169172788 | 0.21       | 0.00241432 | 31317  | lfinngen_R10_015_PRE_OR_ECLAMP\$ukb-b-10002        | TRUE      |      |
| rs9265628  | C | T | C | T | preeclampsia-eclampsia manic/hyper symptoms | 0.105895   | 0.000492009 | 0.248956  | 0.207651  | 31332122  | 0.0184438 | 219817 | 6  | 9.38E-09 | 31299899  | 0.87       | 0.00312034 | 31317  | lfinngen_R10_015_PRE_OR_ECLAMP\$ukb-b-10002        | TRUE      |      |
| rs10790289 | T | C | T | C | preeclampsia-eclampsia bipolar disorder     | 0.117      | -0.00169856 | 0.503037  | 0.5167    | 119215165 | 0.0286    | 267242 | 11 | 4.37E-05 | 119215165 | 0.9594     | 0.0335     | 16731  | ebi-a-GCST90018906                                 | ieu-a-801 | TRUE |
| rs10940601 | T | C | T | C | preeclampsia-eclampsia bipolar disorder     | 0.1261     | 0.00491204  | 0.404733  | 0.4333    | 57487472  | 0.0294    | 267242 | 5  | 1.75E-05 | 57487472  | 0.839      | 0.0241     | 16731  | ebi-a-GCST90018906                                 | ieu-a-801 | TRUE |
| rs11116776 | C | T | C | T | preeclampsia-eclampsia bipolar disorder     | 0.1919     | -0.0322133  | 0.127876  | 0.075     | 85692252  | 0.045     | 267242 | 12 | 2.03E-05 | 85692252  | 0.5714     | 0.057      | 16731  | ebi-a-GCST90018906                                 | ieu-a-801 | TRUE |
| rs12146815 | C | A | C | A | preeclampsia-eclampsia bipolar disorder     | -0.4928    | -0.121332   | 0.0243585 | 0.0339    | 65232258  | 0.1173    | 267242 | 12 | 2.64E-05 | 65232258  | 0.2299     | 0.101      | 16731  | ebi-a-GCST90018906                                 | ieu-a-801 | TRUE |
| rs12249088 | A | G | A | G | preeclampsia-eclampsia bipolar disorder     | 0.3527     | -0.0107577  | 0.0432676 | 0.05      | 83922529  | 0.0845    | 267242 | 10 | 3.01E-05 | 83922529  | 0.8533     | 0.0584     | 16731  | ebi-a-GCST90018906                                 | ieu-a-801 | TRUE |
| rs12417071 | A | G | A | G | preeclampsia-eclampsia bipolar disorder     | 0.2835     | -0.0185714  | 0.0426213 |           | 75220697  | 0.067     | 267242 | 11 | 2.32E-05 | 75220697  | 0.7946     | 0.0715     | 16731  | ebi-a-GCST90018906                                 | ieu-a-801 | TRUE |
| rs1346202  | T | C | T | C | preeclampsia-eclampsia bipolar disorder     | -0.1225    | 0.0730009   | 0.426488  | 0.5       | 107795276 | 0.0291    | 267242 | 12 | 2.64E-05 | 107795276 | 0.00540306 | 0.0262     | 16731  | ebi-a-GCST90018906                                 | ieu-a-801 | TRUE |
| rs1535843  | A | G | A | G | preeclampsia-eclampsia bipolar disorder     | -0.1614    | 0.0457379   | 0.193731  | 0.1667    | 2194871   | 0.0361    | 267242 | 9  | 7.74E-06 | 2194871   | 0.1342     | 0.0306     | 16731  | ebi-a-GCST90018906                                 | ieu-a-801 | TRUE |
| rs1551736  | A | G | A | G | preeclampsia-eclampsia bipolar disorder     | 0.2266     | -0.00250313 | 0.08348   | 0.09167   | 65618598  | 0.0538    | 267242 | 18 | 2.53E-05 | 65618598  | 0.9568     | 0.0465     | 16731  | ebi-a-GCST90018906                                 | ieu-a-801 | TRUE |
| rs17024692 | G | A | G | A | preeclampsia-eclampsia bipolar disorder     | -0.174     | -0.00399202 | 0.118982  | 0.1333    | 101364305 | 0.0425    | 267242 | 2  | 4.28E-05 | 101364305 | 0.9308     | 0.0455     | 16731  | ebi-a-GCST90018906                                 | ieu-a-801 | TRUE |
| rs17364665 | C | A | C | A | preeclampsia-eclampsia bipolar disorder     | 0.2165     | 0.109257    | 0.0794297 | 0.06667   | 48884829  | 0.053     | 267242 | 15 | 4.49E-05 | 48884829  | 0.1468     | 0.0753     | 16731  | ebi-a-GCST90018906                                 | ieu-a-801 | TRUE |
| rs17611988 | C | T | C | T | preeclampsia-eclampsia bipolar disorder     | -0.1204    | 0.0160702   | 0.342801  | 0.3448    | 57000058  | 0.0296    | 267242 | 10 | 4.85E-05 | 57000058  | 0.5156     | 0.0247     | 16731  | ebi-a-GCST90018906                                 | ieu-a-801 | TRUE |
| rs1885234  | G | T | G | T | preeclampsia-eclampsia bipolar disorder     | 0.1178     | -0.0225524  | 0.420343  | 0.4333    | 119252277 | 0.0287    | 267242 | 9  | 4.00E-05 | 119252277 | 0.3453     | 0.0239     | 16731  | ebi-a-GCST90018906                                 | ieu-a-801 | TRUE |
| rs2267249  | T | C | T | C | preeclampsia-eclampsia bipolar disorder     | 0.1252     | 0.016536    | 0.365496  | 0.4583    | 34066846  | 0.0303    | 267242 | 22 | 3.68E-05 | 34066846  | 0.604999   | 0.032      | 16731  | ebi-a-GCST90018906                                 | ieu-a-801 | TRUE |
| rs2350849  | T | G | T | G | preeclampsia-eclampsia bipolar disorder     | -0.131     | 0.00330546  | 0.752584  | 0.7544    | 9534063   | 0.0317    | 267242 | 7  | 3.67E-05 | 9534063   | 0.9304     | 0.0382     | 16731  | ebi-a-GCST90018906                                 | ieu-a-801 | TRUE |
| rs2420953  | C | T | C | T | preeclampsia-eclampsia bipolar disorder     | 0.1889     | -0.0187752  | 0.176961  | 0.114     | 123483879 | 0.0359    | 267242 | 10 | 1.37E-07 | 123483879 | 0.6027     | 0.036      | 16731  | ebi-a-GCST90018906                                 | ieu-a-801 | TRUE |
| rs2716195  | A | G | A | G | preeclampsia-eclampsia bipolar disorder     | 0.1655     | 0.0425804   | 0.147285  | 0.15      | 67528431  | 0.0405    | 267242 | 17 | 4.48E-05 | 67528431  | 0.3931     | 0.0499     | 16731  | ebi-a-GCST90018906                                 | ieu-a-801 | TRUE |
| rs3733845  | A | G | A | G | preeclampsia-eclampsia bipolar disorder     | -0.1774    | 0.00707491  | 0.151854  | 0.08333   | 148804646 | 0.0411    | 267242 | 5  | 1.58E-05 | 148804646 | 0.8436     | 0.036      | 16731  | ebi-a-GCST90018906                                 | ieu-a-801 | TRUE |
| rs3823441  | A | C | A | C | preeclampsia-eclampsia bipolar disorder     | -0.1713    | -0.0256255  | 0.23114   | 0.09167   | 13318030  | 0.0388    | 267242 | 6  | 1.02E-05 | 13318030  | 0.5085     | 0.0387     | 16731  | ebi-a-GCST9                                        |           |      |

|            |   |   |   |   |                                             |         |              |           |           |           |        |        |    |          |           |           |            |        |                    |                    |      |
|------------|---|---|---|---|---------------------------------------------|---------|--------------|-----------|-----------|-----------|--------|--------|----|----------|-----------|-----------|------------|--------|--------------------|--------------------|------|
| rs6502874  | C | T | C | T | preeclampsia-eclampsia bipolar disorder     | 0.2739  | 0.068406     | 0.0719662 | 0.075     | 5612443   | 0.0619 | 267242 | 17 | 9.52E-06 | 5612443   | 0.2215    | 0.056      | 16731  | ebi-a-GCST90018906 | ieu-a-801          | TRUE |
| rs6544107  | T | C | T | C | preeclampsia-eclampsia bipolar disorder     | 0.1812  | -0.00608147  | 0.113096  | 0.1667    | 38009648  | 0.0428 | 267242 | 2  | 2.29E-05 | 38009648  | 0.8547    | 0.0332     | 16731  | ebi-a-GCST90018906 | ieu-a-801          | TRUE |
| rs6902311  | C | A | C | A | preeclampsia-eclampsia bipolar disorder     | 0.26    | 0.191282     | 0.0937803 | 0.025     | 154645163 | 0.0619 | 267242 | 6  | 2.67E-05 | 154645163 | 0.0160299 | 0.0794     | 16731  | ebi-a-GCST90018906 | ieu-a-801          | TRUE |
| rs7110133  | C | T | C | T | preeclampsia-eclampsia bipolar disorder     | 0.1225  | -0.0350056   | 0.496803  | 0.35      | 21121089  | 0.0289 | 267242 | 11 | 2.19E-05 | 21121089  | 0.152     | 0.0244     | 16731  | ebi-a-GCST90018906 | ieu-a-801          | TRUE |
| rs715340   | T | C | T | C | preeclampsia-eclampsia bipolar disorder     | 0.1857  | 0.0447882    | 0.123027  | 0.125     | 14394225  | 0.0439 | 267242 | 1  | 2.38E-05 | 14394225  | 0.3388    | 0.0468     | 16731  | ebi-a-GCST90018906 | ieu-a-801          | TRUE |
| rs730420   | G | C | G | C | preeclampsia-eclampsia bipolar disorder     | 0.1904  | 0.0583709    | 0.138235  | 0.1333    | 7765566   | 0.0426 | 267242 | 4  | 7.88E-06 | 7765566   | 0.1302    | 0.0385     | 16731  | ebi-a-GCST90018906 | ieu-a-801          | TRUE |
| rs7741248  | G | A | G | A | preeclampsia-eclampsia bipolar disorder     | 0.3317  | -0.0348844   | 0.0362327 | 0.09167   | 128760481 | 0.0787 | 267242 | 6  | 2.49E-05 | 128760481 | 0.559899  | 0.0598     | 16731  | ebi-a-GCST90018906 | ieu-a-801          | TRUE |
| rs817373   | A | G | A | G | preeclampsia-eclampsia bipolar disorder     | 0.1269  | 0.0182328    | 0.471976  |           | 62533190  | 0.0311 | 267242 | 20 | 4.54E-05 | 62533190  | 0.528     | 0.0289     | 16731  | ebi-a-GCST90018906 | ieu-a-801          | TRUE |
| rs10112094 | T | G | T | G | preeclampsia-eclampsia depression           | 0.4436  | -0.0048      | 0.0289487 | 0.0285642 | 144237533 | 0.0968 | 267242 | 8  | 4.59E-06 | 144237533 | 0.9259    | 0.0512     | 449414 | ebi-a-GCST90018906 | ebi-a-GCST90018833 | TRUE |
| rs10192639 | A | G | A | G | preeclampsia-eclampsia depression           | -0.4568 | -0.1075      | 0.944702  | 0.943529  | 205647254 | 0.091  | 267242 | 2  | 5.19E-07 | 205647254 | 0.2032    | 0.0845     | 449414 | ebi-a-GCST90018906 | ebi-a-GCST90018833 | TRUE |
| rs13117303 | T | A | T | A | preeclampsia-eclampsia depression           | -0.2371 | 0.0055       | 0.36676   | 0.366903  | 133614587 | 0.0472 | 267242 | 4  | 5.06E-07 | 133614587 | 0.9412    | 0.0743     | 449414 | ebi-a-GCST90018906 | ebi-a-GCST90018833 | TRUE |
| rs13125101 | A | G | A | G | preeclampsia-eclampsia depression           | 0.1462  | 0.0271       | 0.313468  | 0.31636   | 81174592  | 0.0306 | 267242 | 4  | 1.78E-06 | 81174592  | 0.0558805 | 0.0142     | 449414 | ebi-a-GCST90018906 | ebi-a-GCST90018833 | TRUE |
| rs13789537 | G | T | G | T | preeclampsia-eclampsia depression           | 0.4561  | 0.0277       | 0.0326301 | 0.0327666 | 150135473 | 0.0887 | 267242 | 1  | 2.74E-07 | 150135473 | 0.4827    | 0.0394     | 449414 | ebi-a-GCST90018906 | ebi-a-GCST90018833 | TRUE |
| rs1649221  | A | G | A | G | preeclampsia-eclampsia depression           | -0.1453 | 0.02         | 0.269564  | 0.261985  | 34987758  | 0.0316 | 267242 | 7  | 4.20E-06 | 34987758  | 0.1812    | 0.0149     | 449414 | ebi-a-GCST90018906 | ebi-a-GCST90018833 | TRUE |
| rs1858787  | G | A | G | A | preeclampsia-eclampsia depression           | 0.215   | 0.0651       | 0.609934  | 0.609938  | 61962111  | 0.0462 | 267242 | 2  | 3.35E-06 | 61962111  | 0.3707    | 0.0727     | 449414 | ebi-a-GCST90018906 | ebi-a-GCST90018833 | TRUE |
| rs2420953  | C | T | C | T | preeclampsia-eclampsia depression           | 0.1889  | 0.0104       | 0.176961  | 0.181809  | 123483879 | 0.0359 | 267242 | 10 | 1.37E-07 | 123483879 | 0.4999    | 0.0154     | 449414 | ebi-a-GCST90018906 | ebi-a-GCST90018833 | TRUE |
| rs4240782  | C | G | C | G | preeclampsia-eclampsia depression           | 0.1624  | -0.0091      | 0.749228  | 0.750535  | 86930650  | 0.0356 | 267242 | 16 | 4.98E-06 | 86930650  | 0.599     | 0.0173     | 449414 | ebi-a-GCST90018906 | ebi-a-GCST90018833 | TRUE |
| rs62157471 | G | C | G | C | preeclampsia-eclampsia depression           | 0.5624  | 0.1586       | 0.0413116 | 0.0409482 | 113145337 | 0.1206 | 267242 | 2  | 3.13E-06 | 113145337 | 0.3865    | 0.1832     | 449414 | ebi-a-GCST90018906 | ebi-a-GCST90018833 | TRUE |
| rs7174985  | G | T | G | T | preeclampsia-eclampsia depression           | 0.1441  | 0.0031       | 0.342872  | 0.3425    | 74274948  | 0.0296 | 267242 | 15 | 1.13E-06 | 74274948  | 0.8216    | 0.0138     | 449414 | ebi-a-GCST90018906 | ebi-a-GCST90018833 | TRUE |
| rs77674430 | A | G | A | G | preeclampsia-eclampsia depression           | 0.2107  | 0.0044       | 0.132015  | 0.132416  | 224517064 | 0.0437 | 267242 | 1  | 1.44E-06 | 224517064 | 0.825     | 0.0201     | 449414 | ebi-a-GCST90018906 | ebi-a-GCST90018833 | TRUE |
| rs7772738  | A | G | A | G | preeclampsia-eclampsia depression           | -0.185  | -0.0124      | 0.473025  | 0.470432  | 120381629 | 0.0404 | 267242 | 6  | 4.79E-06 | 120381629 | 0.7622    | 0.041      | 449414 | ebi-a-GCST90018906 | ebi-a-GCST90018833 | TRUE |
| rs9948846  | G | A | G | A | preeclampsia-eclampsia depression           | -0.1355 | 0.0263       | 0.548838  | 0.545972  | 35066814  | 0.0287 | 267242 | 18 | 2.35E-06 | 35066814  | 0.05199   | 0.0135     | 449414 | ebi-a-GCST90018906 | ebi-a-GCST90018833 | TRUE |
| rs13125101 | A | G | A | G | preeclampsia-eclampsia manic/hyper symptoms | 0.1462  | -0.00315075  | 0.313468  | 0.289991  | 81174592  | 0.0306 | 267242 | 4  | 1.78E-06 | 81174592  | 0.24      | 0.00266175 | 31317  | ebi-a-GCST90018906 | ukb-b-10002        | TRUE |
| rs1649221  | A | G | A | G | preeclampsia-eclampsia manic/hyper symptoms | -0.1453 | 0.000161693  | 0.269564  | 0.318326  | 34987758  | 0.0316 | 267242 | 7  | 4.20E-06 | 34987758  | 0.95      | 0.00260096 | 31317  | ebi-a-GCST90018906 | ukb-b-10002        | TRUE |
| rs1858787  | G | A | G | A | preeclampsia-eclampsia manic/hyper symptoms | 0.215   | -0.000572428 | 0.609934  | 0.607561  | 61962111  | 0.0462 | 267242 | 2  | 3.35E-06 | 61962111  | 0.82      | 0.00247838 | 31317  | ebi-a-GCST90018906 | ukb-b-10002        | TRUE |
| rs2420953  | C | T | C | T | preeclampsia-eclampsia manic/hyper symptoms | 0.1889  | -0.00435788  | 0.176961  | 0.118555  | 123483879 | 0.0359 | 267242 | 10 | 1.37E-07 | 123483879 | 0.25      | 0.00376916 | 31317  | ebi-a-GCST90018906 | ukb-b-10002        | TRUE |
| rs4240782  | C | G | C | G | preeclampsia-eclampsia manic/hyper symptoms | 0.1624  | 0.000231152  | 0.749228  | 0.740429  | 86930650  | 0.0356 | 267242 | 16 | 4.98E-06 | 86930650  | 0.93      | 0.00275135 | 31317  | ebi-a-GCST90018906 | ukb-b-10002        | TRUE |
| rs7174985  | G | T | G | T | preeclampsia-eclampsia manic/hyper symptoms | 0.1441  | -0.00175509  | 0.342872  | 0.330131  | 74274948  | 0.0296 | 267242 | 15 | 1.13E-06 | 74274948  | 0.5       | 0.00257879 | 31317  | ebi-a-GCST90018906 | ukb-b-10002        | TRUE |
| rs77674430 | A | G | A | G | preeclampsia-eclampsia manic/hyper symptoms | 0.2107  | -0.00276418  | 0.132015  | 0.128173  | 224517064 | 0.0437 | 267242 | 1  | 1.44E-06 | 224517064 | 0.44      | 0.00360429 | 31317  | ebi-a-GCST90018906 | ukb-b-10002        | TRUE |
| rs7772738  | A | G | A | G | preeclampsia-eclampsia manic/hyper symptoms | -0.185  | 0.00278632   | 0.473025  | 0.481989  | 120381629 | 0.0404 | 267242 | 6  | 4.79E-06 | 120381629 | 0.25      | 0.00242813 | 31317  | ebi-a-GCST90018906 | ukb-b-10002        | TRUE |
| rs9948846  | G | A | G | A | preeclampsia-eclampsia manic/hyper symptoms | -0.1355 | 0.00296966   | 0.548838  | 0.571225  | 35066814  | 0.0287 | 267242 | 18 | 2.35E-06 | 35066814  | 0.23      | 0.00246925 | 31317  | ebi-a-GCST90018906 | ukb-b-10002        | TRUE |



**Table S3: Estimates of causal effect of three subtypes of mood disorders on preeclampsia-eclampsia**

| Exposure             | Outcome                         | number<br>of SNP | IVW             |         | MR-Egger         |         | Weighted median |         | Weighted mode   |         | Meta-analysis   |         |
|----------------------|---------------------------------|------------------|-----------------|---------|------------------|---------|-----------------|---------|-----------------|---------|-----------------|---------|
|                      |                                 |                  | OR (95% CI)     | P-value | OR (95% CI)      | P-value | OR (95% CI)     | P-value | OR (95% CI)     | P-value | OR (95% CI)     | P-value |
| bipolar disorder     | preeclampsia-eclampsia(FinnGen) | 14               | 1.16(1.08-1.24) | <0.001  | 1.25(0.99-1.59)  | 0.089   | 1.16(1.05-1.27) | 0.002   | 1.14(1.00-1.31) | 0.077   | 1.15(1.08-1.22) | <0.001  |
| bipolar disorder     | preeclampsia-eclampsia(IEU)     | 6                | 1.11(0.95-1.30) | 0.207   | 1.10(0.65-1.85)  | 0.207   | 1.10(0.65-1.85) | 0.746   | 1.14(0.94-1.39) | 0.187   |                 |         |
| depression           | preeclampsia-eclampsia(FinnGen) | 22               | 1.06(1.00-1.13) | 0.048   | 1.05(0.99-1.14)  | 0.184   | 1.05(0.97-1.13) | 0.202   | 1.05(0.98-1.13) | 0.194   | 1.07(1.01-1.13) | 0.01    |
| depression           | preeclampsia-eclampsia(IEU)     | 22               | 1.14(0.98-1.32) | 0.101   | 1.03(0.82-1.30)  | 0.792   | 1.07(0.85-1.34) | 0.551   | 1.05(0.83-1.32) | 0.703   |                 |         |
| manic/hyper symptoms | preeclampsia-eclampsia(FinnGen) | 33               | 0.86(0.51-1.46) | 0.572   | 0.41(0.01-28.51) | 0.683   | 0.80(0.39-1.66) | 0.551   | 0.95(0.19-4.67) | 0.949   | 0.82(0.51-1.31) | 0.41    |
| manic/hyper symptoms | preeclampsia-eclampsia(IEU)     | 33               | 1.05(0.97-1.14) | 0.203   | 1.11(0.81-1.51)  | 0.515   | 1.01(0.90-1.13) | 0.893   | 0.95(0.69-1.32) | 0.778   |                 |         |

OR, odds ratio; CI, confidence interval; IVW, inverse variance weighting; SNP:single-nucleotide polymorphism; MR, Mendelian randomization.

**Table S4: Estimates of causal effect of preeclampsia-eclampsia on three subtypes of mood disorders**

| Exposure                        | Outcome              | number<br>of SNP | IVW             |         | MR-Egger        |         | Weighted median |         | Weighted mode   |         | Meta-analysis   |         |
|---------------------------------|----------------------|------------------|-----------------|---------|-----------------|---------|-----------------|---------|-----------------|---------|-----------------|---------|
|                                 |                      |                  | OR (95% CI)     | P-value |
| preeclampsia-eclampsia(FinnGen) | bipolar disorder     | 38               | 0.90(0.80-1.02) | 0.105   | 0.62(0.42-0.92) | 0.022   | 0.92(0.77-1.08) | 0.307   | 0.74(0.54-1.02) | 0.078   | 0.96(0.88-1.05) | 0.34    |
| preeclampsia-eclampsia(IEU)     | bipolar disorder     | 31               | 0.99(0.92-1.07) | 0.814   | 1.29(1.00-1.65) | 0.057   | 0.97(0.87-1.08) | 0.579   | 0.96(0.80-1.15) | 0.636   |                 |         |
| preeclampsia-eclampsia(FinnGen) | depression           | 12               | 1.11(0.98-1.26) | 0.11    | 1.00(0.70-1.42) | 0.979   | 1.14(1.10-1.29) | 0.052   | 1.14(0.98-1.34) | 0.123   | 1.04(0.96-1.13) | 0.31    |
| preeclampsia-eclampsia(IEU)     | depression           | 14               | 1.02(0.95-1.08) | 0.637   | 1.15(0.96-1.37) | 0.159   | 1.02(0.94-1.11) | 0.625   | 1.03(0.92-1.16) | 0.593   |                 |         |
| preeclampsia-eclampsia(FinnGen) | manic/hyper symptoms | 8                | 1.00(0.99-1.02) | 0.66    | 0.93(0.84-1.03) | 0.216   | 1.00(0.98-1.03) | 0.913   | 0.99(0.95-1.03) | 0.581   | 0.99(0.98-1.01) | 0.46    |
| preeclampsia-eclampsia(IEU)     | manic/hyper symptoms | 9                | 1.00(0.94-1.06) | 0.975   | 0.91(0.75-1.12) | 0.407   | 0.99(0.94-1.05) | 0.777   | 1.01(0.92-1.11) | 0.828   |                 |         |

OR, odds ratio; CI, confidence interval; IVW, inverse variance weighting; SNP:single-nucleotide polymorphism; MR, Mendelian randomization.
